# Supplementary material for: RNAi Silencing of the Biomineralization Gene Perlucin Impairs Oyster Ability to Cope with Ocean Acidification
Source: MDPI journal article supplement (doi:10.3390/ijms24043661), 2023-02-11
Supplement: s1 [file s1]

**Table S1.** Perlucin expression was compared between treatments for Experiment 1 (day 3) and Experiment 2 (day 5) and this table shows results of pairwise multiple comparison Student-Newman-Keuls test after ANOVA, n=3

| <b>Comparison</b>                  | <b>P-value</b> |
|------------------------------------|----------------|
| Experiment 1 Dsi to SW (control)   | 0.002          |
| Experiment 1 Dsi to NC (control)   | 0.001          |
| Experiment 1 NC to SW (control)    | 0.45           |
| Experiment 1 Dsi to SW (acidified) | 0.048          |
| Experiment 1 Dsi to NC (acidified) | 0.02           |
| Experiment 1 NC to SW (acidified)  | 0.379          |
| Experiment 2 Dsi to SW (control)   | 0.027          |
| Experiment 2 Dsi to NC (control)   | 0.015          |
| Experiment 2 NC to SW (control)    | 0.0993         |
| Experiment 2 Dsi to SW (acidified) | 0.022          |
| Experiment 2 Dsi to NC (acidified) | 0.024          |
| Experiment 2 NC to SW (acidified)  | 0.593          |

Footnote: Dsi: DsiRNA-Perlucin, NC: DsiRNA-NC5, SW: seawater

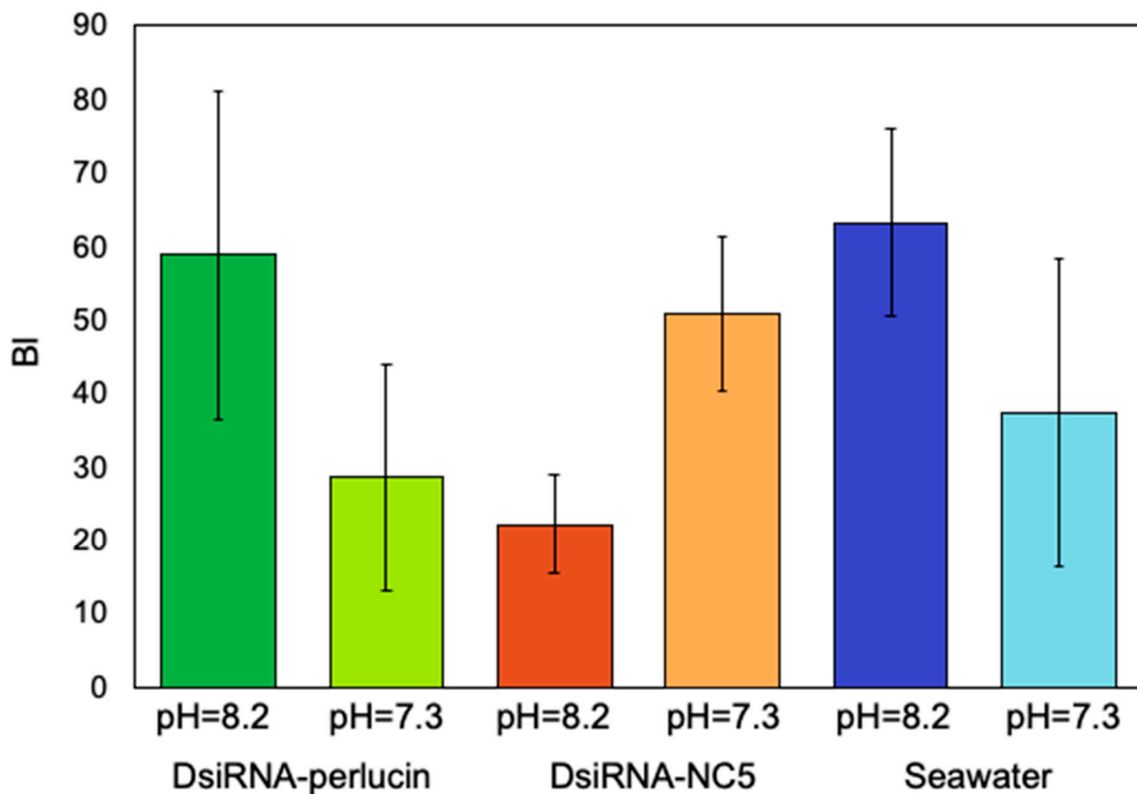

**Figure S1.** Shell birefringence index (BI, mean  $\pm$  standard deviation) of oyster larvae from Experiment 1, day 3. N=30 individuals per treatment.

**Table S2.** Advantages and disadvantages to each transfection method

|                             | Method 1 | Method 2 |
|-----------------------------|----------|----------|
| Natural spawning            | ✗        | ✓        |
| Time to $p\text{CO}_2$      | ✓        | ✗        |
| Time to silence perlucin    | ✓        | ✗        |
| Viability from transfection | ✓        | ✓        |
| Reduced perlucin expression | ✓        | ✓        |
| Multiple samples            | ✗        | ✓        |

### Method 1

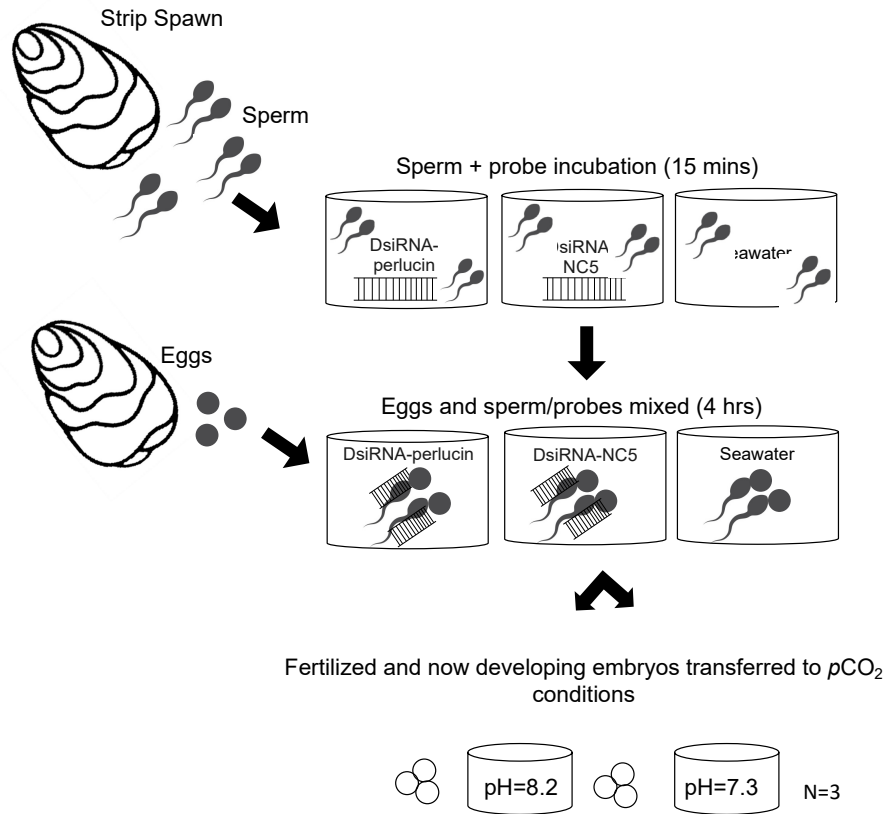

**Figure S2.** Experiment 1 design which used the sperm as a vehicle to carry the DsiRNA into the eggs.

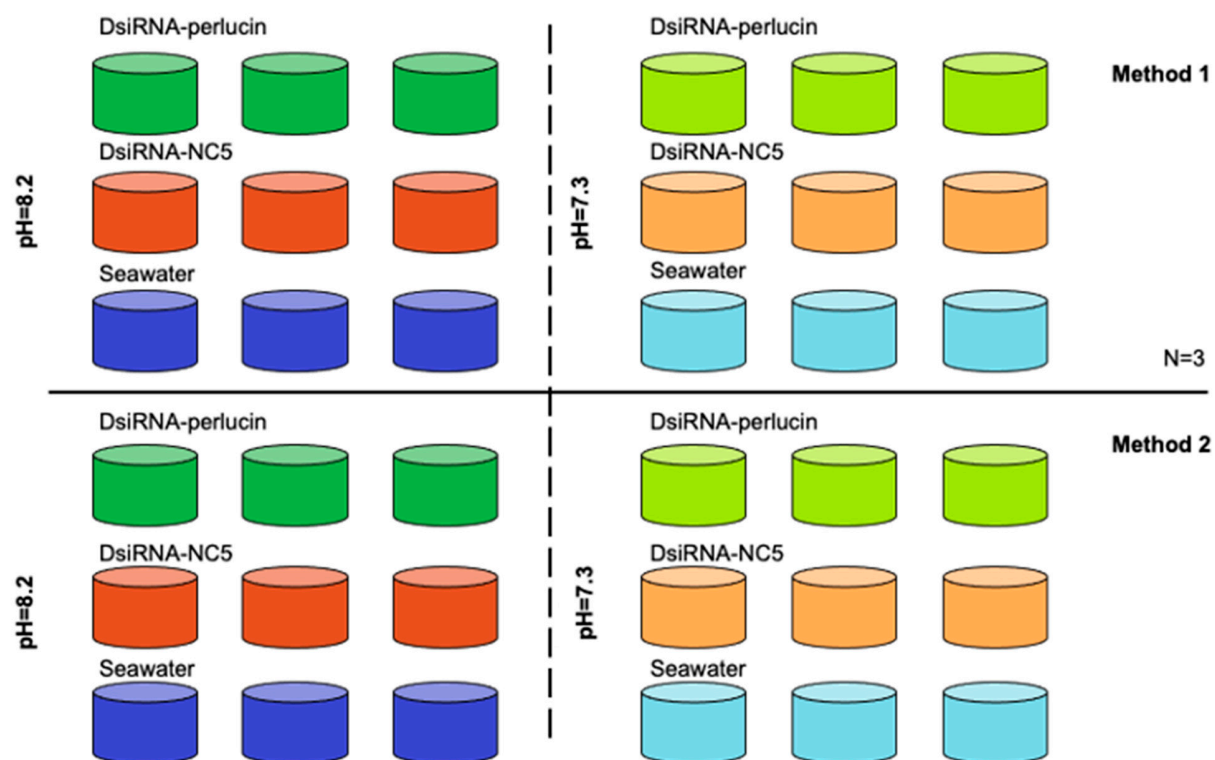

**Figure S3.** Experimental set up for  $p\text{CO}_2$  treatments

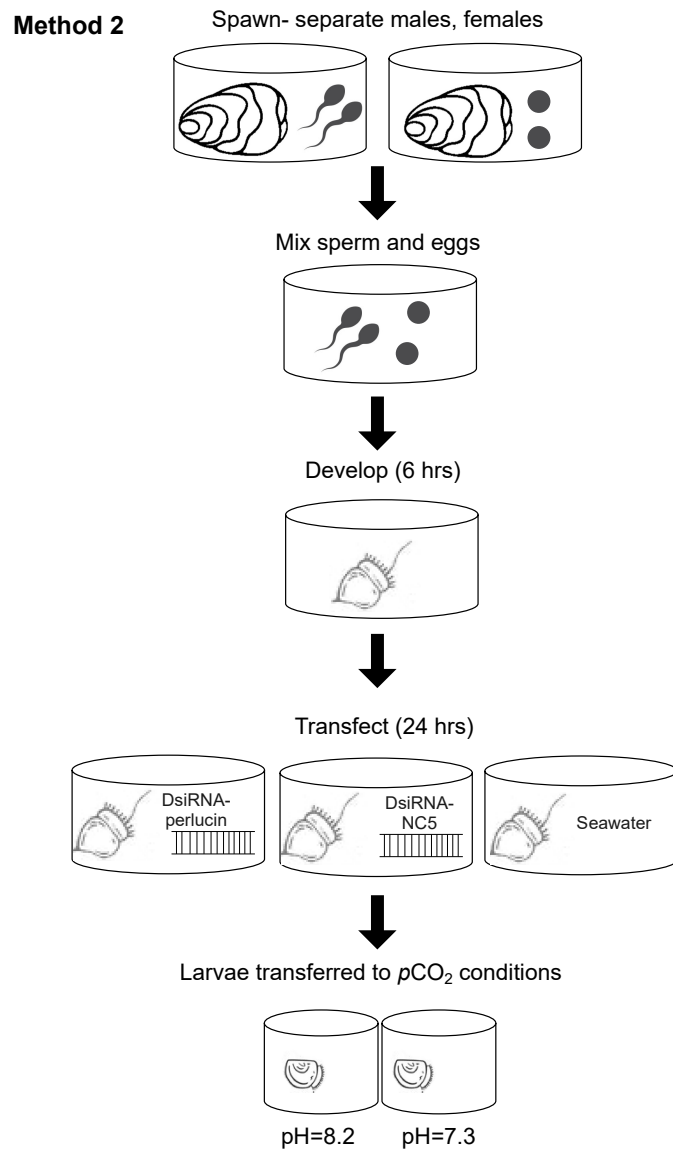

**Figure S4.** Experiment 2 design which relied on passive uptake of DsiRNA in developing larvae.

**Table S3.** Seawater carbonate chemistry values  $\pm$  SD for gene silencing experiments. GS refers to DsiRNA-perlucin; NC refers to DsiRNA-NC5; SW refers to seawater.

|                     | pH <sub>T</sub> | pCO <sub>2</sub><br>(uatm) | Ω Ca     | Ω Ar     | TCO <sub>2</sub><br>(μmol L <sup>-1</sup> ) | CO <sub>3</sub> <sup>2-</sup><br>(μmol L <sup>-1</sup> ) | Total Alkalinity<br>(μmol L <sup>-1</sup> ) |
|---------------------|-----------------|----------------------------|----------|----------|---------------------------------------------|----------------------------------------------------------|---------------------------------------------|
| <i>Experiment 1</i> |                 |                            |          |          |                                             |                                                          |                                             |
| GS OA               | 7.3±0.04        | 341±338                    | 0.6±1    | 0.4±0.04 | 2088±64                                     | 24±2                                                     | 2018±65                                     |
| GS Control          | 8.2±0.01        | 411±12                     | 4.1±0.1  | 2.6±0.1  | 1927±35                                     | 158±5                                                    | 2141±40                                     |
| NC OA               | 7.3±0.02        | 3335±229                   | 0.6±0.01 | 0.4±0.01 | 2081±80                                     | 24±0.4                                                   | 2013±72                                     |
| NC Control          | 8.2±0.00        | 407±4                      | 4.2±0.03 | 2.7±0.02 | 1914±19                                     | 160±1                                                    | 2131±19                                     |
| SW OA               | 7.3±0.03        | 3508±151                   | 0.6±0.1  | 0.4±0.04 | 2062±82                                     | 22±2                                                     | 1987±87                                     |
| SW Control          | 8.2±0.01        | 402±0.05                   | 4.2±0.1  | 2.7±0.1  | 1909±38                                     | 161±3                                                    | 2126±39                                     |
| <i>Experiment 2</i> |                 |                            |          |          |                                             |                                                          |                                             |
| GS OA               | 7.3±0.01        | 3708±239                   | 0.5±0.02 | 0.3±0.01 | 2017±97                                     | 20±1                                                     | 1934±90                                     |
| GS Control          | 8.2±0.00        | 386±2                      | 4.1±0.02 | 2.6±0.01 | 1867±9                                      | 159±1                                                    | 2084±10                                     |
| NC OA               | 7.3±0.02        | 3571±120                   | 0.6±0.04 | 0.4±0.02 | 2164±15                                     | 24±1                                                     | 2088±121                                    |
| NC Control          | 8.2±0.01        | 368±3                      | 4.3±0.2  | 2.8±0.1  | 1891±32                                     | 160±1                                                    | 2131±19                                     |
| SW OA               | 7.3±0.1         | 3861±436                   | 0.6±0.1  | 0.4±0.03 | 2149±33                                     | 22±2                                                     | 2062±23                                     |
| SW Control          | 8.2±0.02        | 380±11                     | 4.4±0.2  | 2.8±0.1  | 1936±48                                     | 170±9                                                    | 2167±58                                     |

## Normal

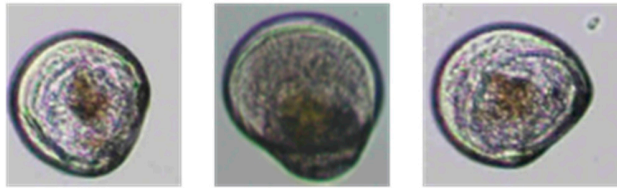

## Deformed

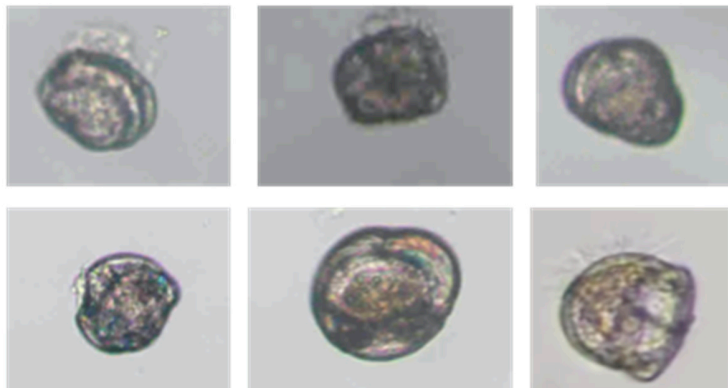

**Figure S5.** Representative photos of normal (top) and deformed (bottom) eastern oyster larvae from gene silencing experiments

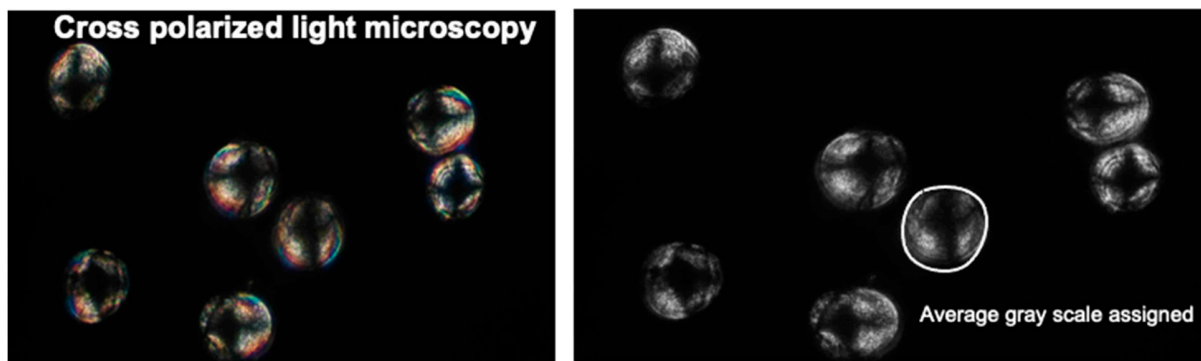

**Figure S6.** Photos were taken using cross polarized light microscopy to measure birefringence. Images were converted to gray scale, and individual larvae were circled and assigned a value ranging between 0 and 255 using ImageJ software.
